# Supplementary material
Source: PubMed Central journal article supplement (PMC2600855)
Supplement: NIHMS61219-supplement-si20060502_055.pdf [file NIHMS61219-supplement-si20060502_055.pdf]

**Supporting Information for “Effects of Temperature and Salt  
Concentration on the Structural Stability of Human  
Lymphotactin: Insights from Molecular Simulations”**

<sup>1</sup>Mark S. Formanek, <sup>2</sup>Liang Ma, and <sup>1,2</sup>Qiang Cui

<sup>1</sup>*Department of Chemistry and Theoretical Chemistry Institute,*

<sup>2</sup>*Graduate Program in Biophysics, University of Wisconsin,*

*Madison, 1101 University Ave, Madison, WI 53706*

(Dated: May 2, 2006)

## I. ADDITIONAL SIMULATION RESULTS

**Fig. S1**

Root-mean-squared deviation (RMSD) of hLtn during the MD simulations under the four conditions summarized in Table 1 in the main text. The calculations are over residues from three different selections of the backbone atoms (N, C<sub>α</sub>, C, O): the entire protein (1:68), residues 20 to 68 (20:68), and residues 20 to 63 (20:63). RMS best-fit of the MD structures to the averaged NMR structure is performed in all calculations with the backbone atoms of residue 20 to 68. Clearly, the N-terminal residues are rather disordered in all simulations. The C-terminal residues are more disordered in the 45°C simulations.

**Fig. S2**

(a) Root-mean-squared fluctuations (RMSFs) of the C<sub>α</sub> atoms from the s10 simulation compared to those estimated based on the ensemble of NMR structures in the PDB file (1J9O)<sup>2</sup>. The calculated RMSF profile for the s10 condition is largely consistent with that estimated based on the ensemble of NMR structures given in the PDB file (1J9O) although the calculated RMSFs tend to be systematically larger, especially for mobile regions such as the 30's and 40's loops. (b) RMSFs of the C<sub>α</sub> atoms calculated based on the four MD simulations under different conditions. (c) Difference between the C<sub>α</sub> atom position in the averaged-NMR structure and the average structure from each MD simulation. The secondary structures are represented with sideways triangles for residues in β-sheets and with 'X' for residues in the α-helix. (d) Calculated NMR order parameters for the backbone N-H bond vectors for all residues, except for Pro 20 and Pro 50. For numerical reasons, the equilibrium approach for evaluating order parameters is used, in which the order parameter is given as the following,

$$S^2 = \frac{3}{2}(\langle x^2 \rangle^2 + \langle y^2 \rangle^2 + \langle z^2 \rangle^2 + 2\langle xy \rangle^2 + 2\langle xz \rangle^2 + 2\langle yz \rangle^2) - \frac{1}{2} \quad (1)$$

where  $x, y, z$  indicate the components of the NH bond vector of interest, after the overall translation and rotation of the entire protein is removed based on RMS best-fit to the initial structure in the simulation.

Most sheet regions have low RMSF below 1 Å small deviations ( $<1.5$  Å) from the average NMR structure and large ( $>0.85$ ) N-H order parameters.

**Fig. S3**

Selected backbone hydrogen bonding interactions in the 30's- and 40's-loop regions during the MD simulations. (a) Backbone hydrogen-bond patterns between  $\beta 1$  and  $\beta 2$  (b1 to b5) and between  $\beta 2$  and  $\beta 3$  (b6 to b10). Distances from N to O are plotted as a function of time for each simulation for: (b) b5 plus b4 for s45 only (thick dashed line) and (c) b6.

**Fig. S4**

Average number of water molecules in the first solvation shell of chloride or sodium ions for 50 fs intervals during the simulation, calculated from integrating the  $g(r)$  of water oxygen atoms out to 3.8 Å for chloride and 3.1 Å for sodium. For each plot, each line represents solvation number around an individual ion and all ions are plotted. When such "coordination number" is below 8 for chloride or 6 for sodium, that ion is associated with the protein (and/or another ion) so as to push one or more water molecules out of the first solvation shell. The plots vs. the minimal distances of the ions to the protein surface show many concurrent changes (data not included), which support the argument for ion-exchange during the simulations.

**II. FULL REFERENCE FOR REF. 58**

A. D. MacKerell, Jr. D. Bashford, M. Bellott, R. L. Jr. Dunbrack, J. D. Evenseck, M. J. Field, S. Fischer, J. Gao, H. Guo, S. Ha, D. Joseph-McCarthy, L. Kuchnir, K. Kuczera, F. T. K. Lau, C. Mattos, S. Michnick, T. Ngo, D. T. Nguyen, B. Prodhom, W. E. I. Reiher, B. Roux, M. Schlenkrich, J. C. Smith, R. Stote, J. Straub, M. Watanabe, J. Wiórkiewicz-Kuczera, D. Yin, and M. Karplus, *J. Phys. Chem.* **1998**, 102, 3586-3616.

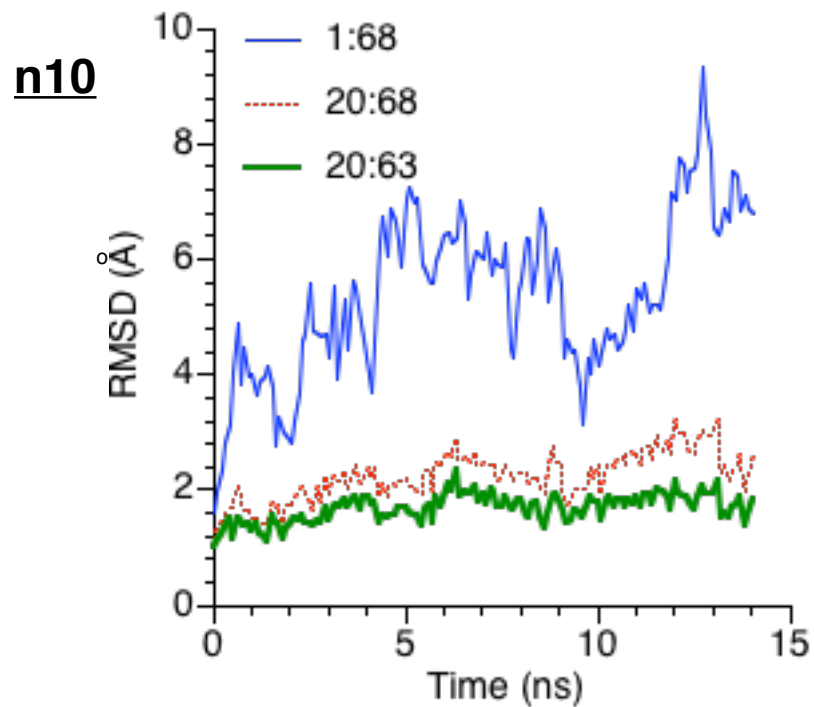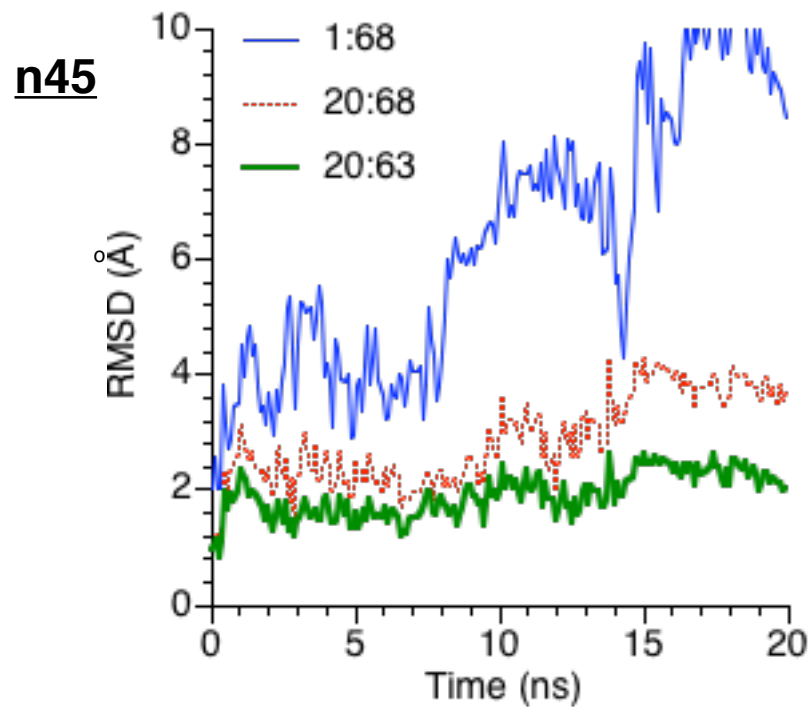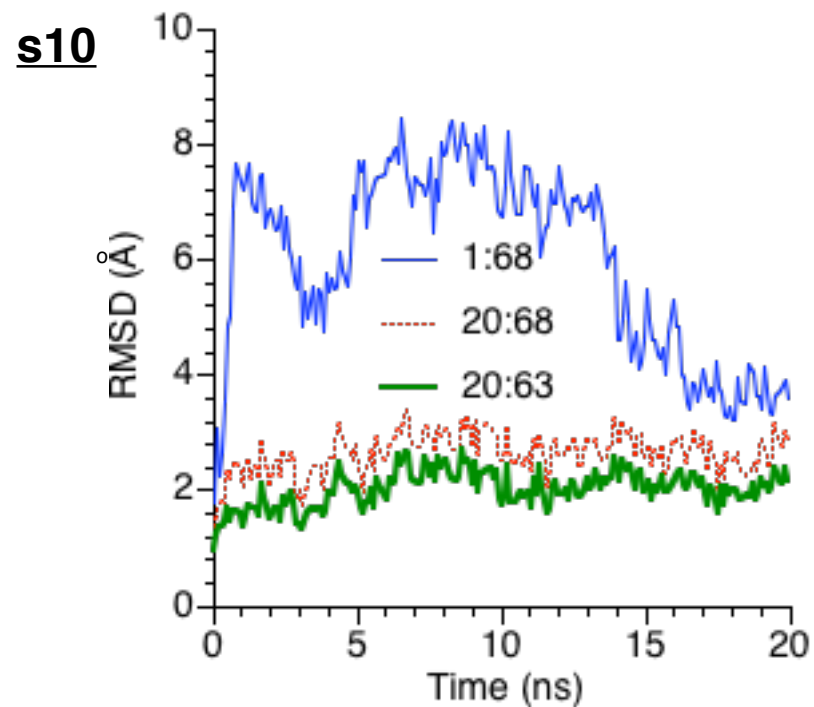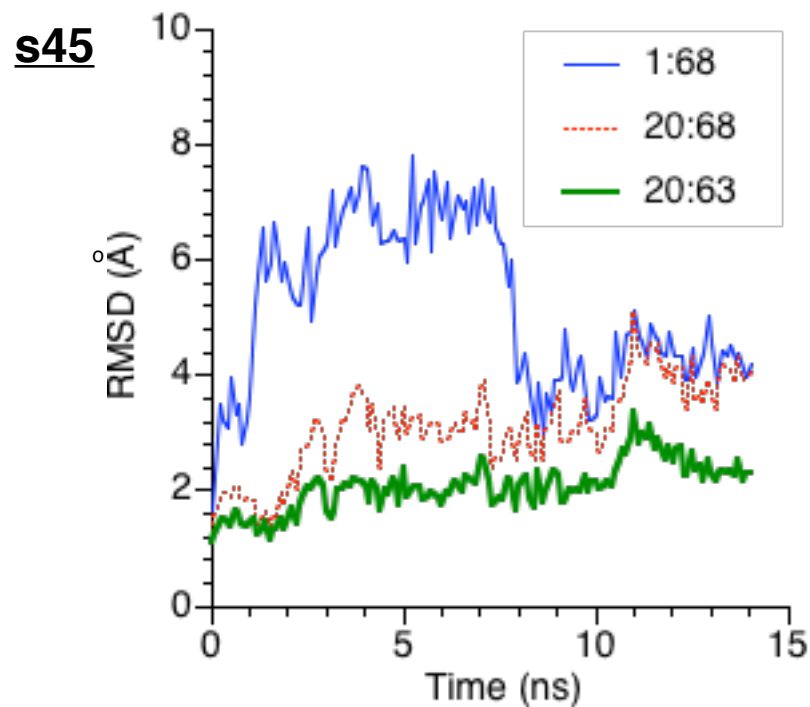

Fig S1

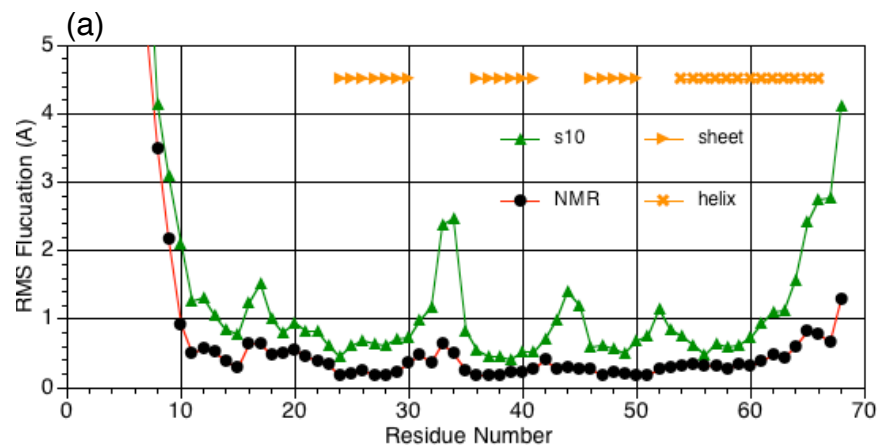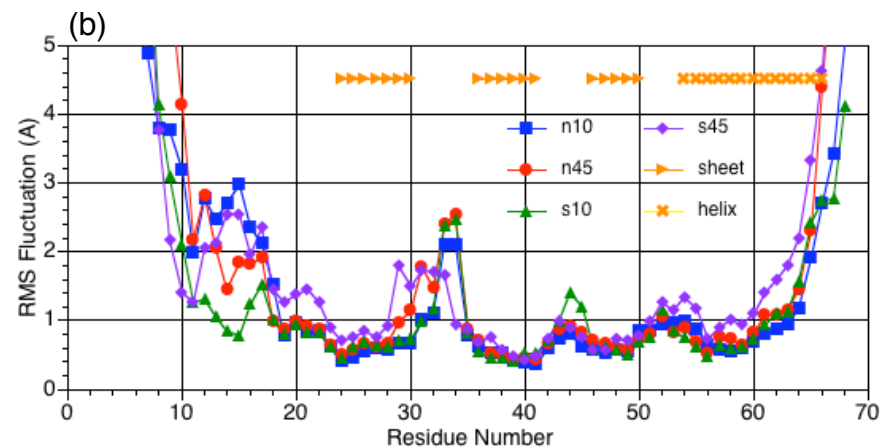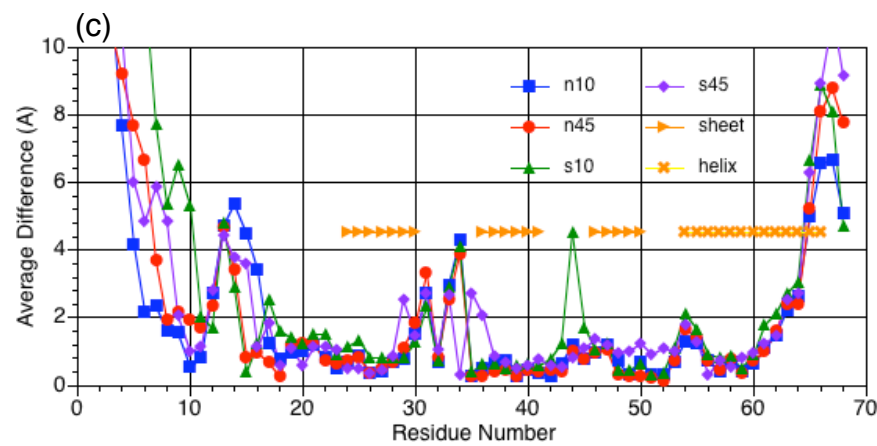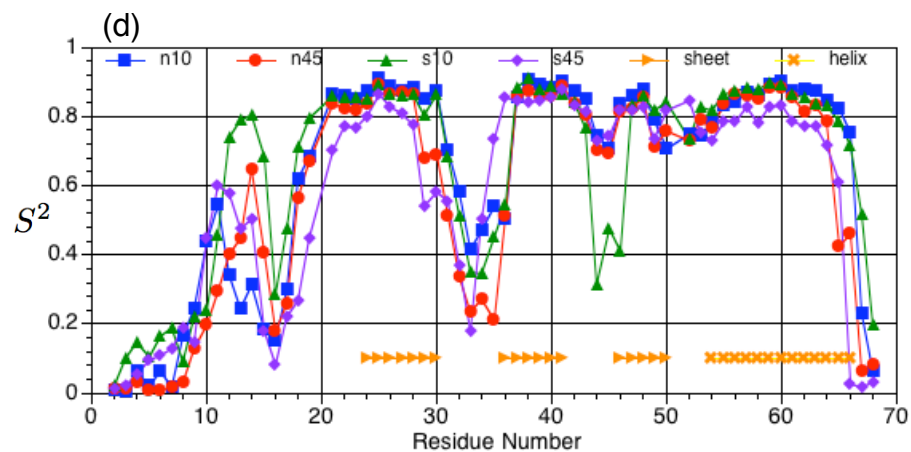

Fig S2

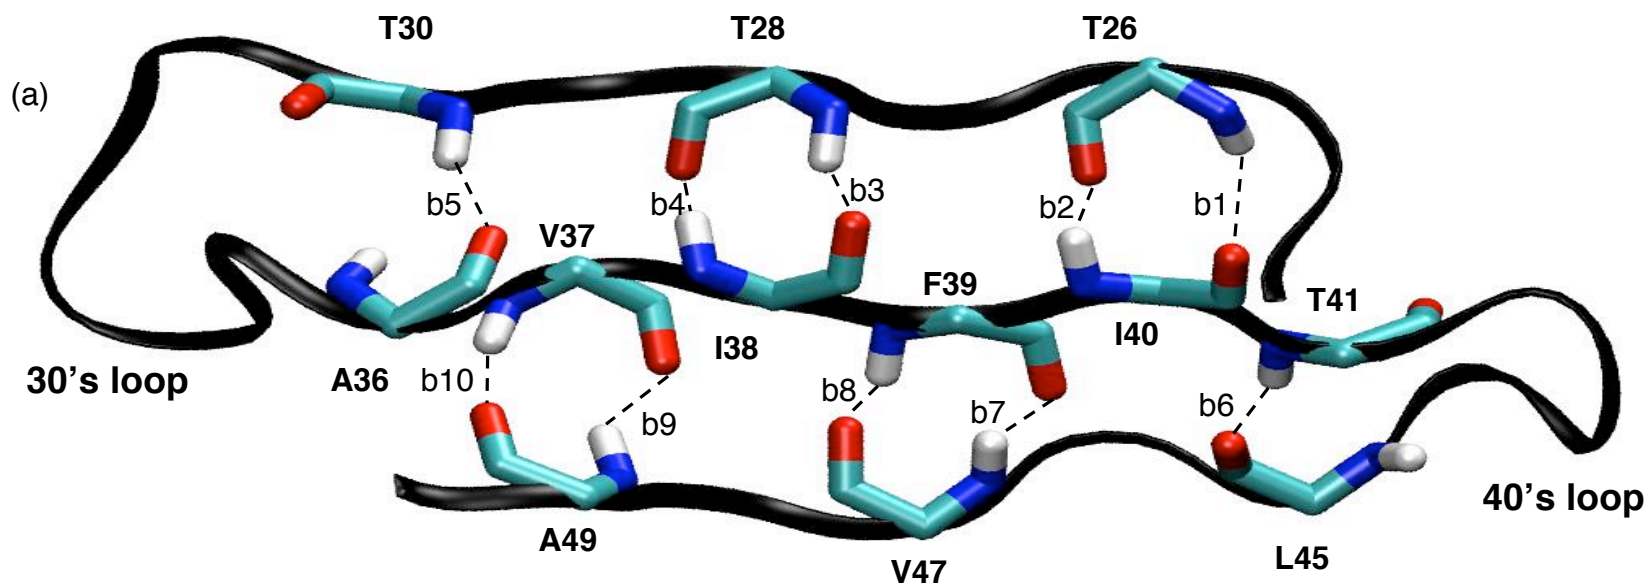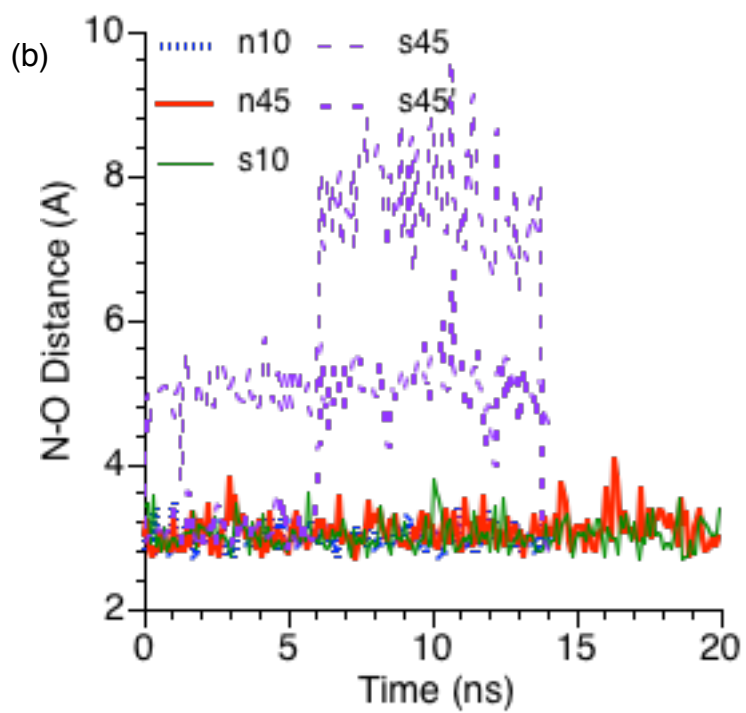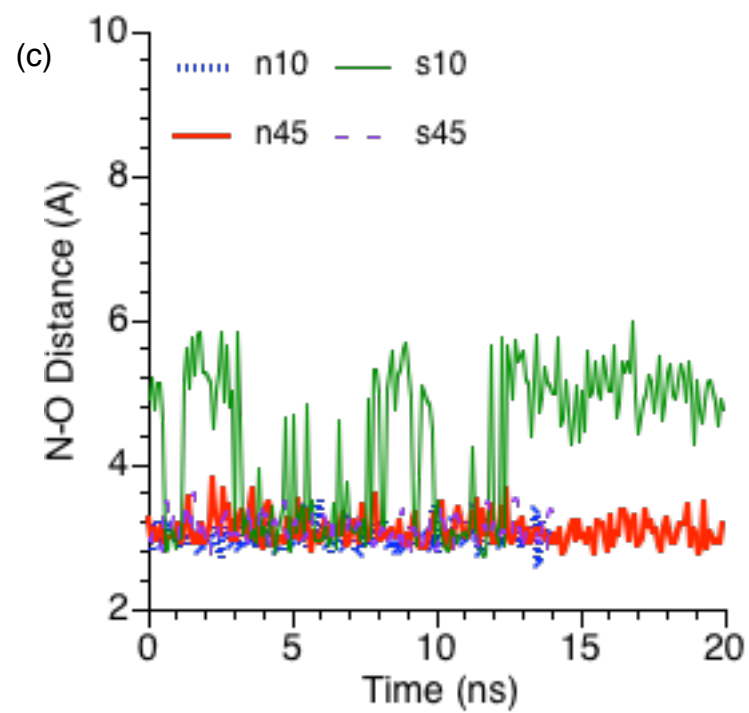

Fig S3

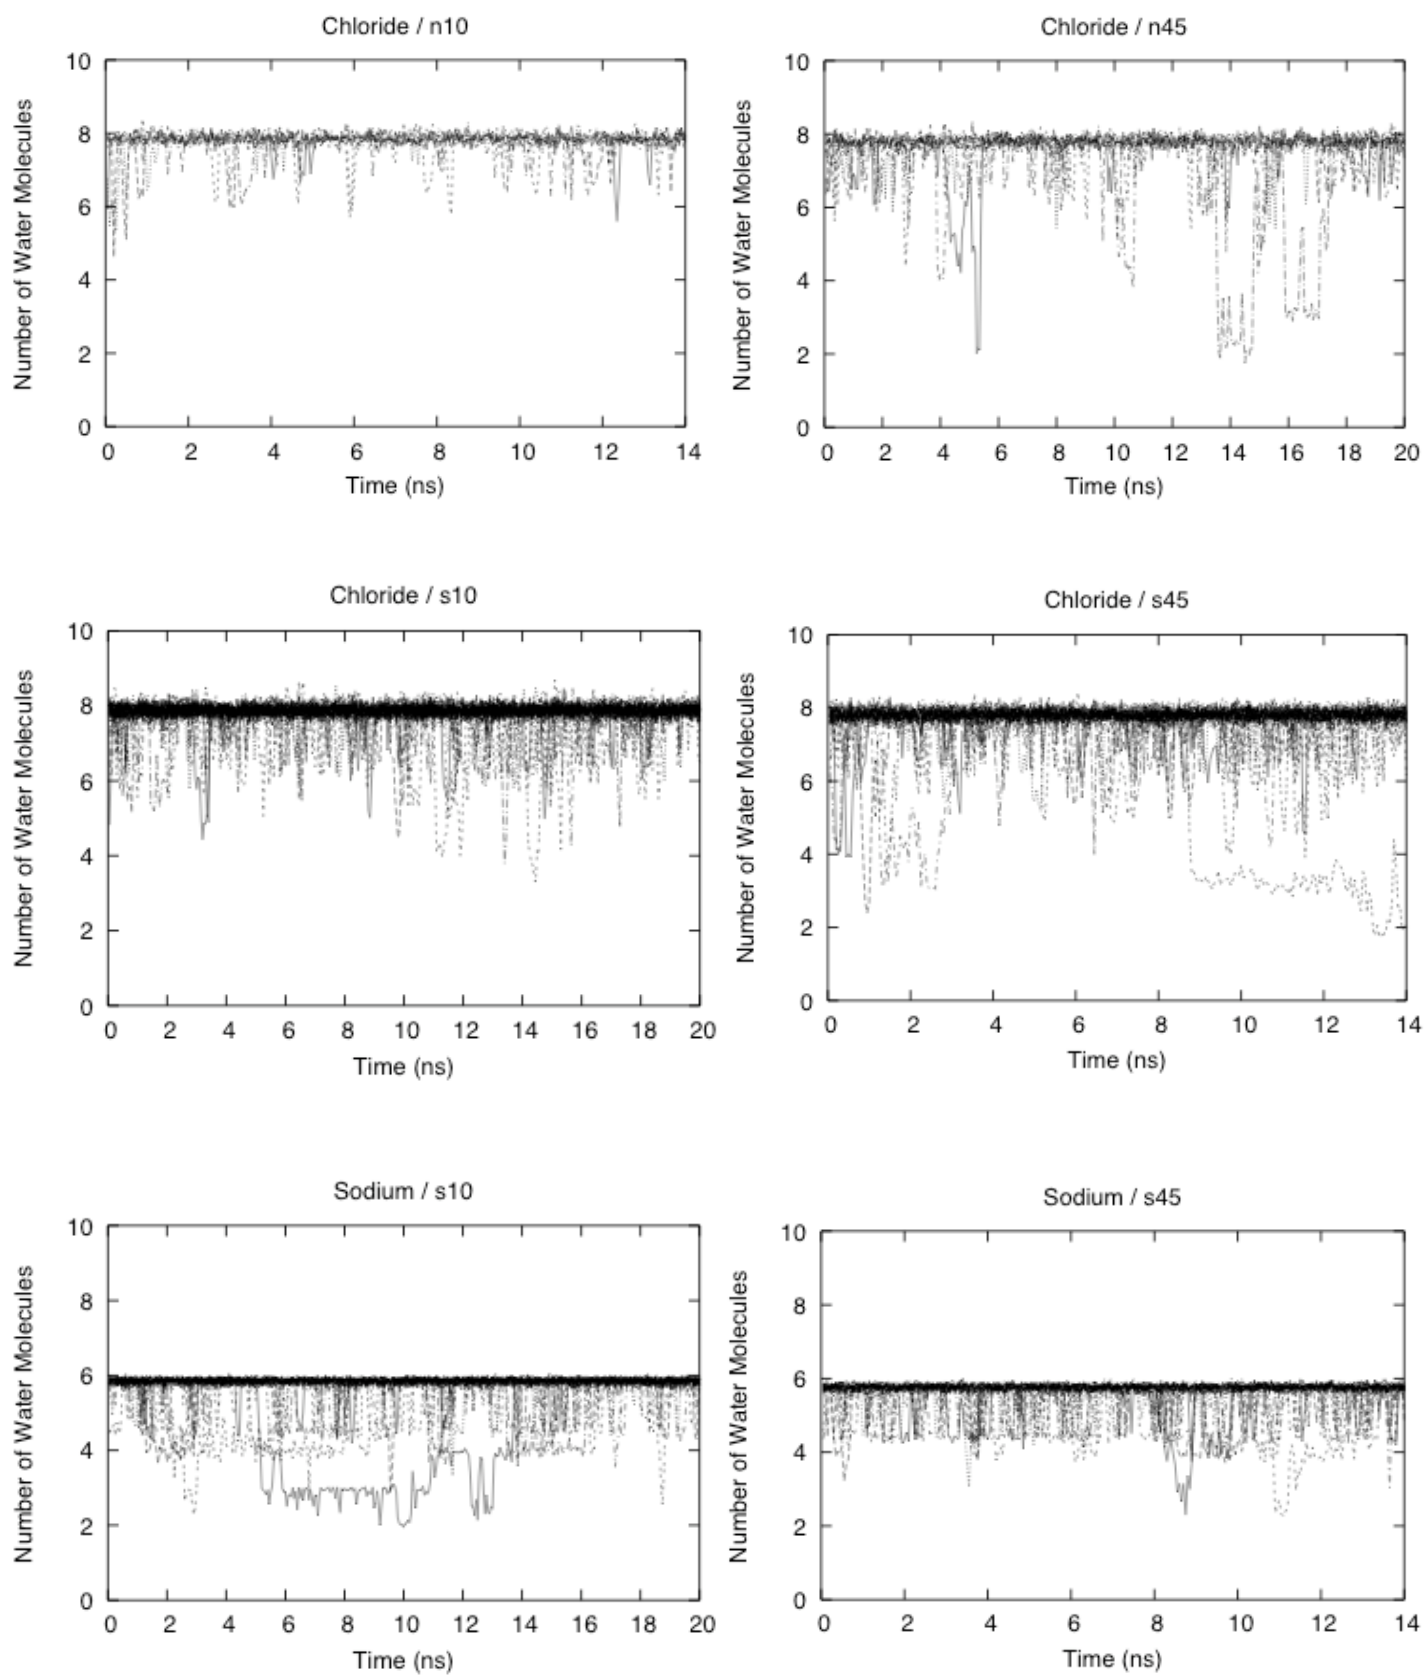

Fig S4
